# Supplementary material for: Enriching the Bioactive Components and Antioxidant Capacity of Concentrated Lime Juices Prepared by Cryogenic and Vacuum Processes
Source: MDPI journal article supplement (doi:10.3390/pr11071883), 2023-06-23
Supplement: s1 [file s1]

Supplementary Material

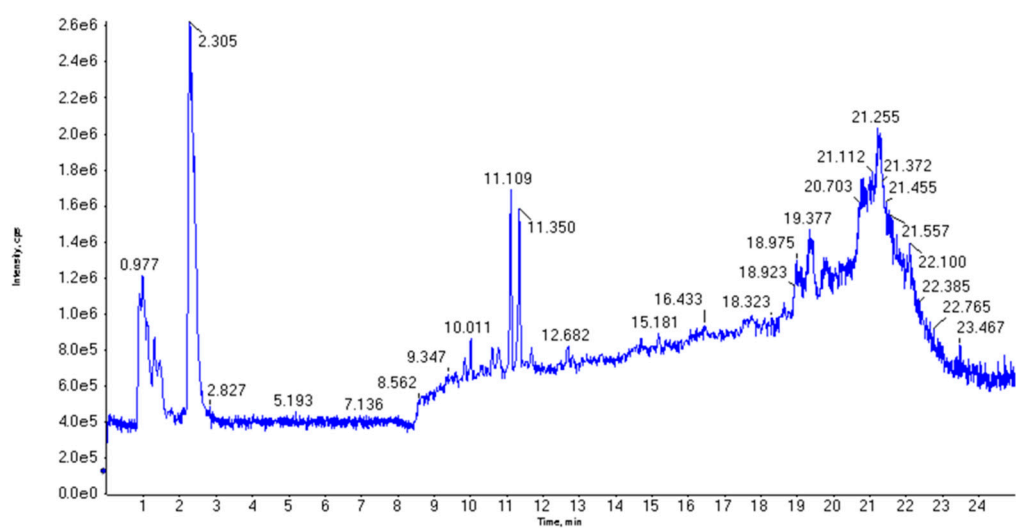

A

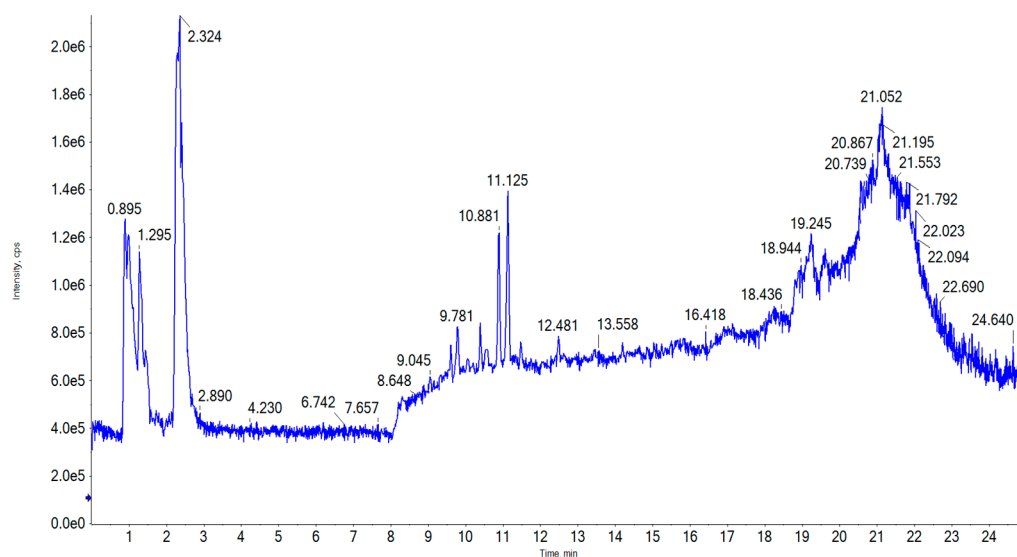

B

**Figure S1.** Chromatograms of *C. latifolia* (A) and *C. limonia* (B) juices acquired from quantitative analysis by LC-QTOF MS/MS.

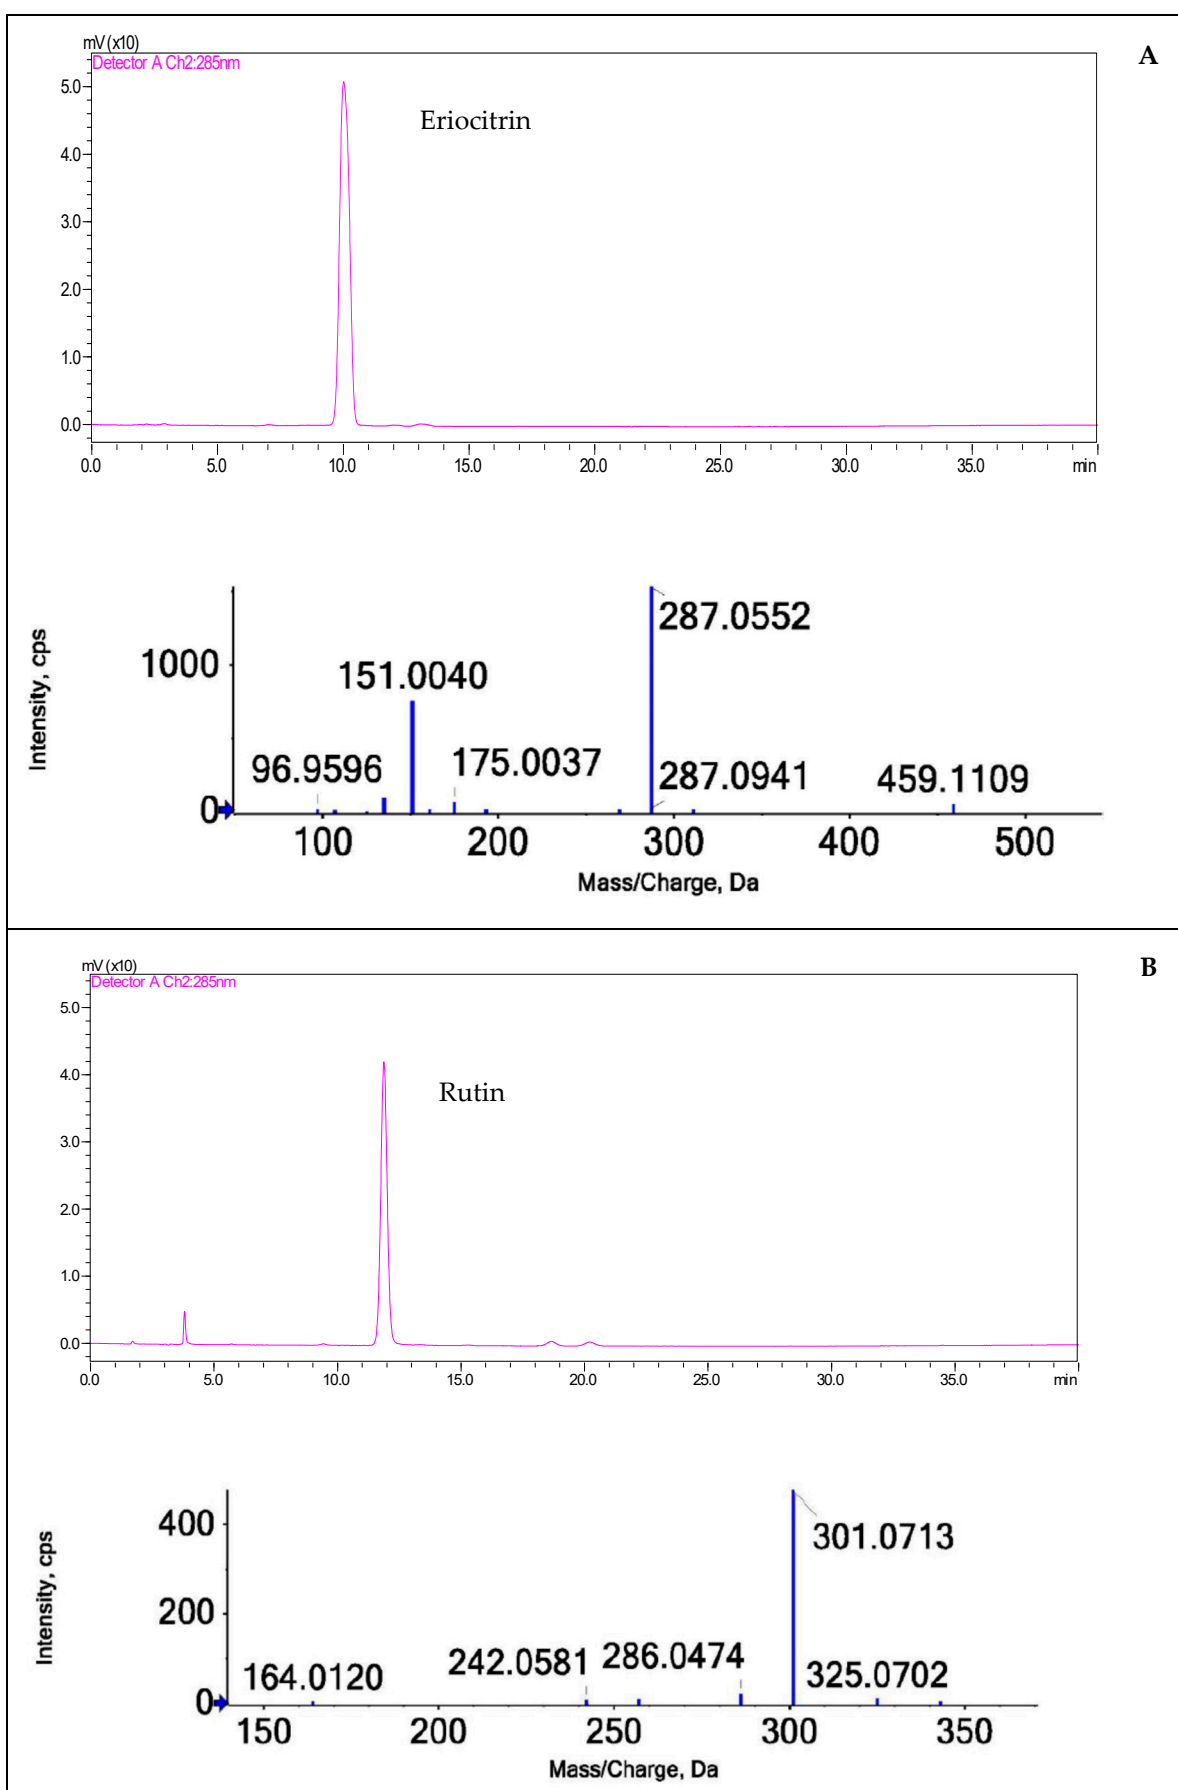

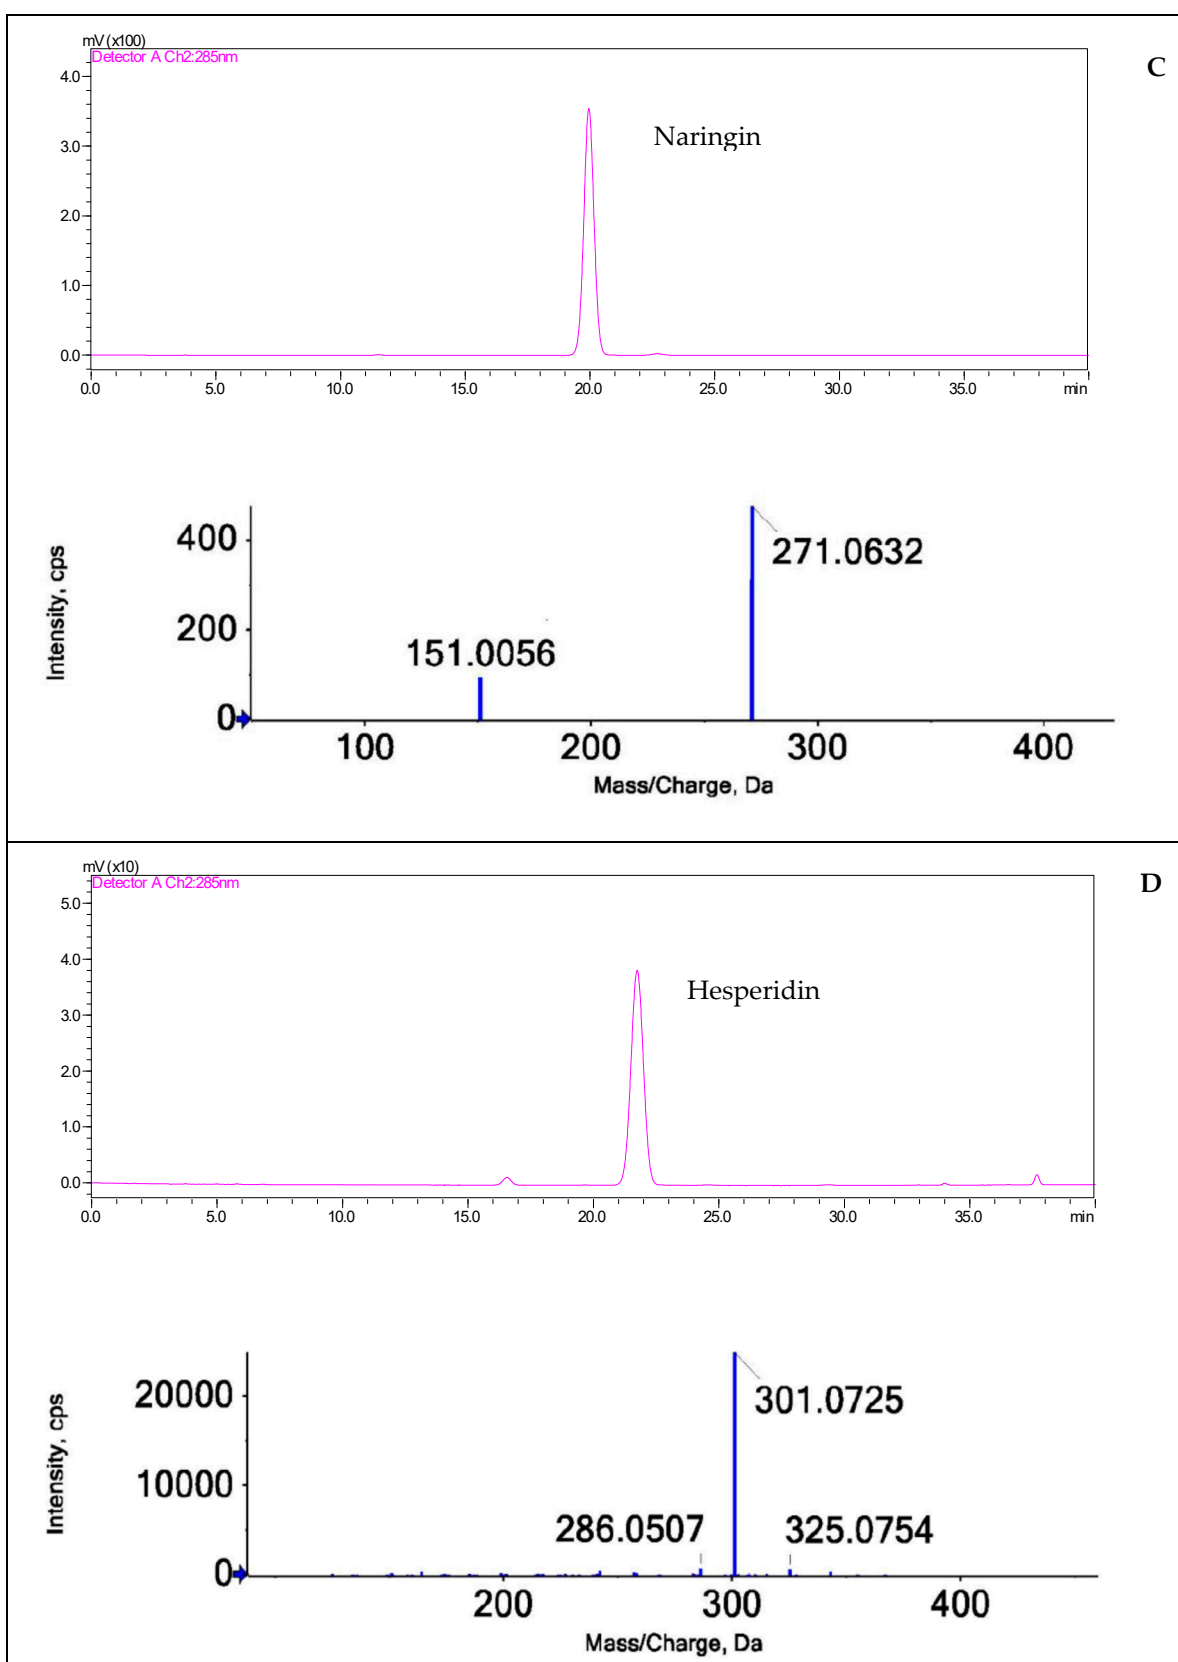

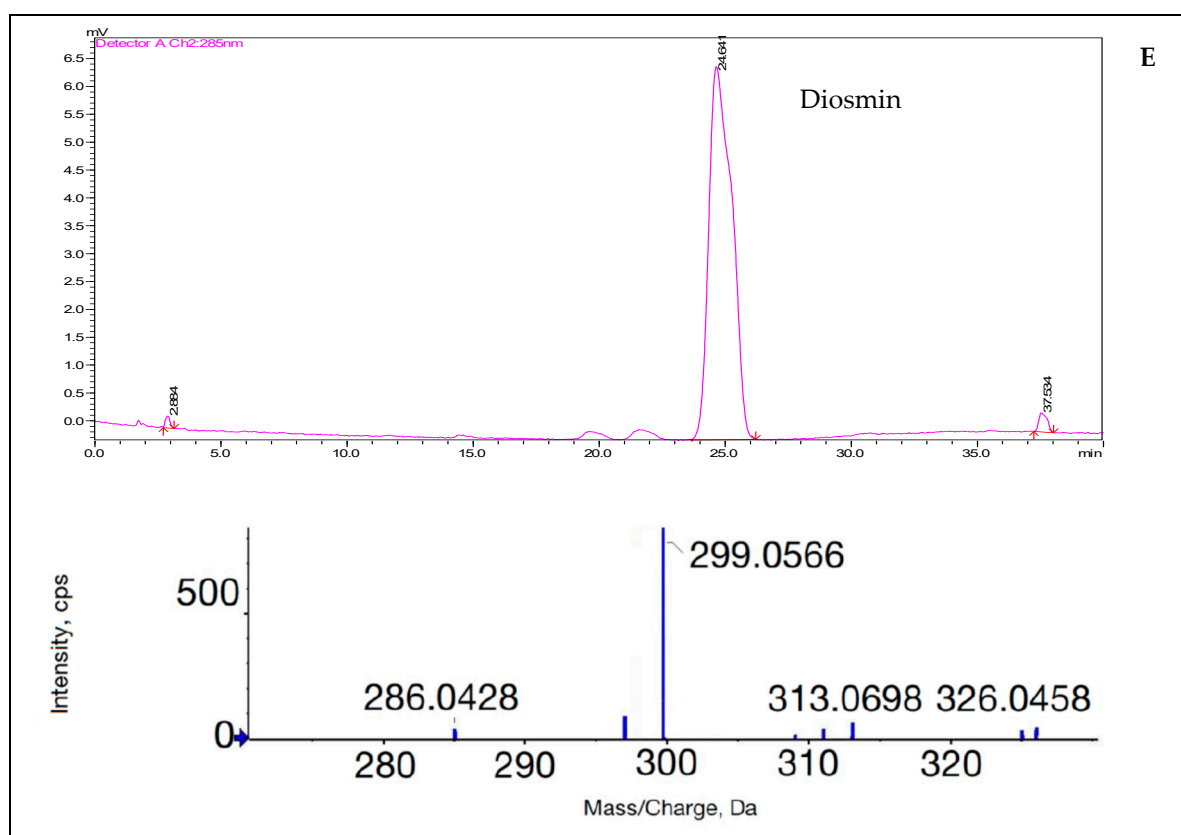

**Figure S2.** Chromatograms and MS spectra of standards: eriocitrin (A), rutin (B), naringin (C), hesperidin (D) and diosmin (E).

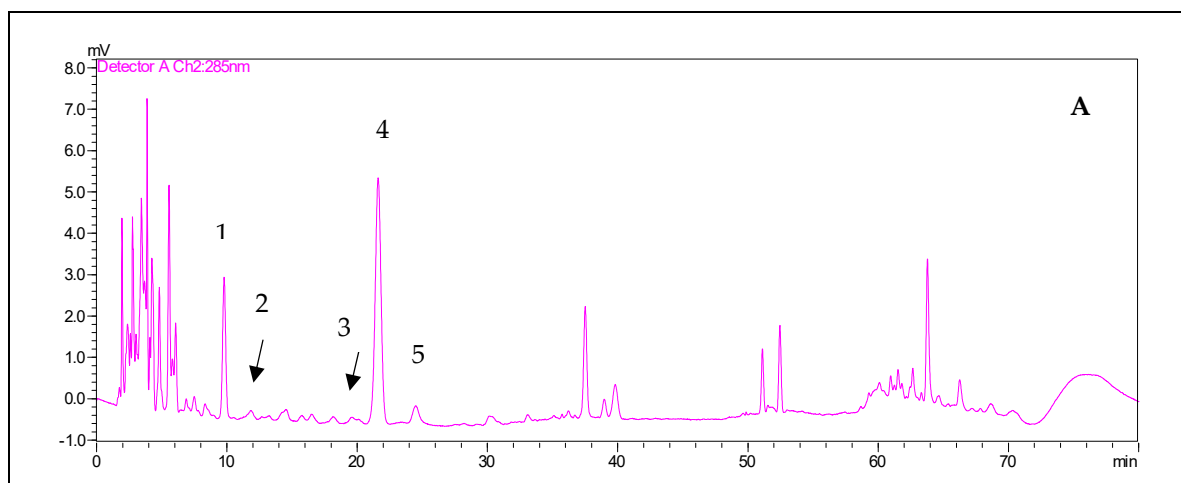

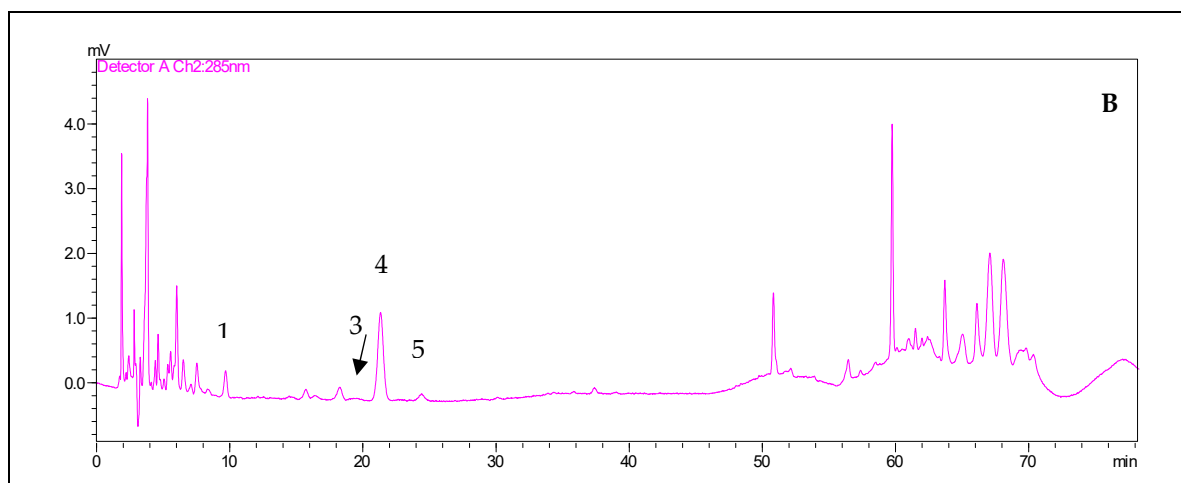

**Figure S3.** HPLC-PDA chromatograms of *C. latifolia* (A) and *C. limonia* (B) juices at 280 nm. Elution of compounds are marked 1. eriocitrin, 2. rutin, 3. naringin, 4. Hesperidin, and 5. diosmin. Note with absence of rutin in *C. limonia* juice.
